# Supplementary material for: Chemoselective reduction of 2-acyl-N-sulfonylpyrroles: Synthesis of 3-pyrrolines and 2-alkylpyrroles
Source: Royal Society of Chemistry journal article supplement (doi:10.1039/c1ob05111c), 2011-01-01

1-[1-(*p*-Tolylsulfonyl)pyrrol-2-yl]butan-1-one (**9**)

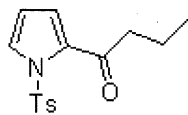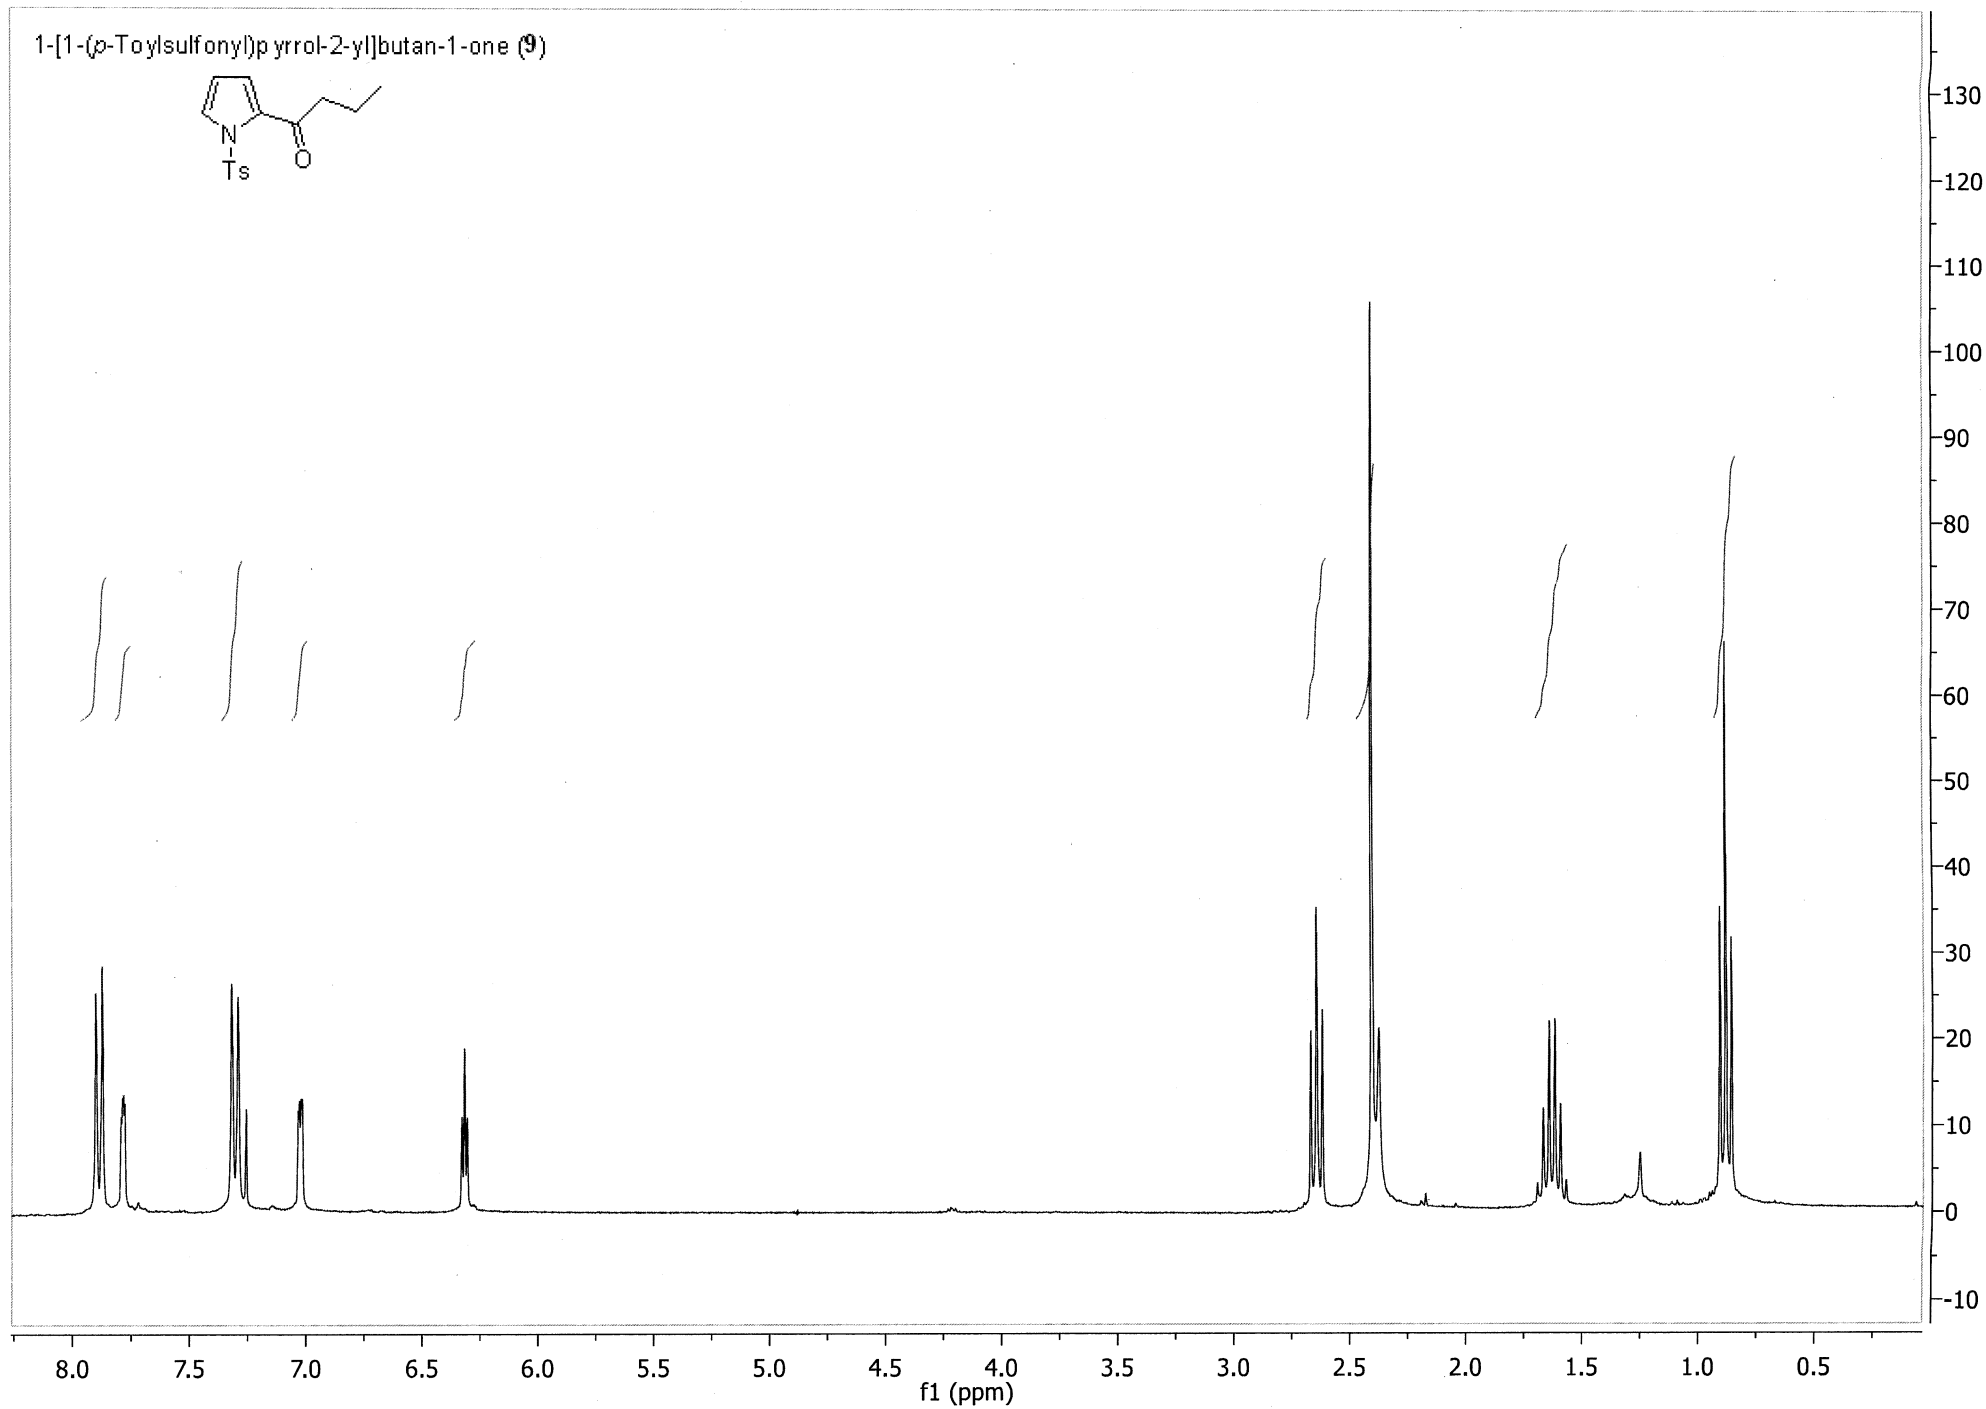

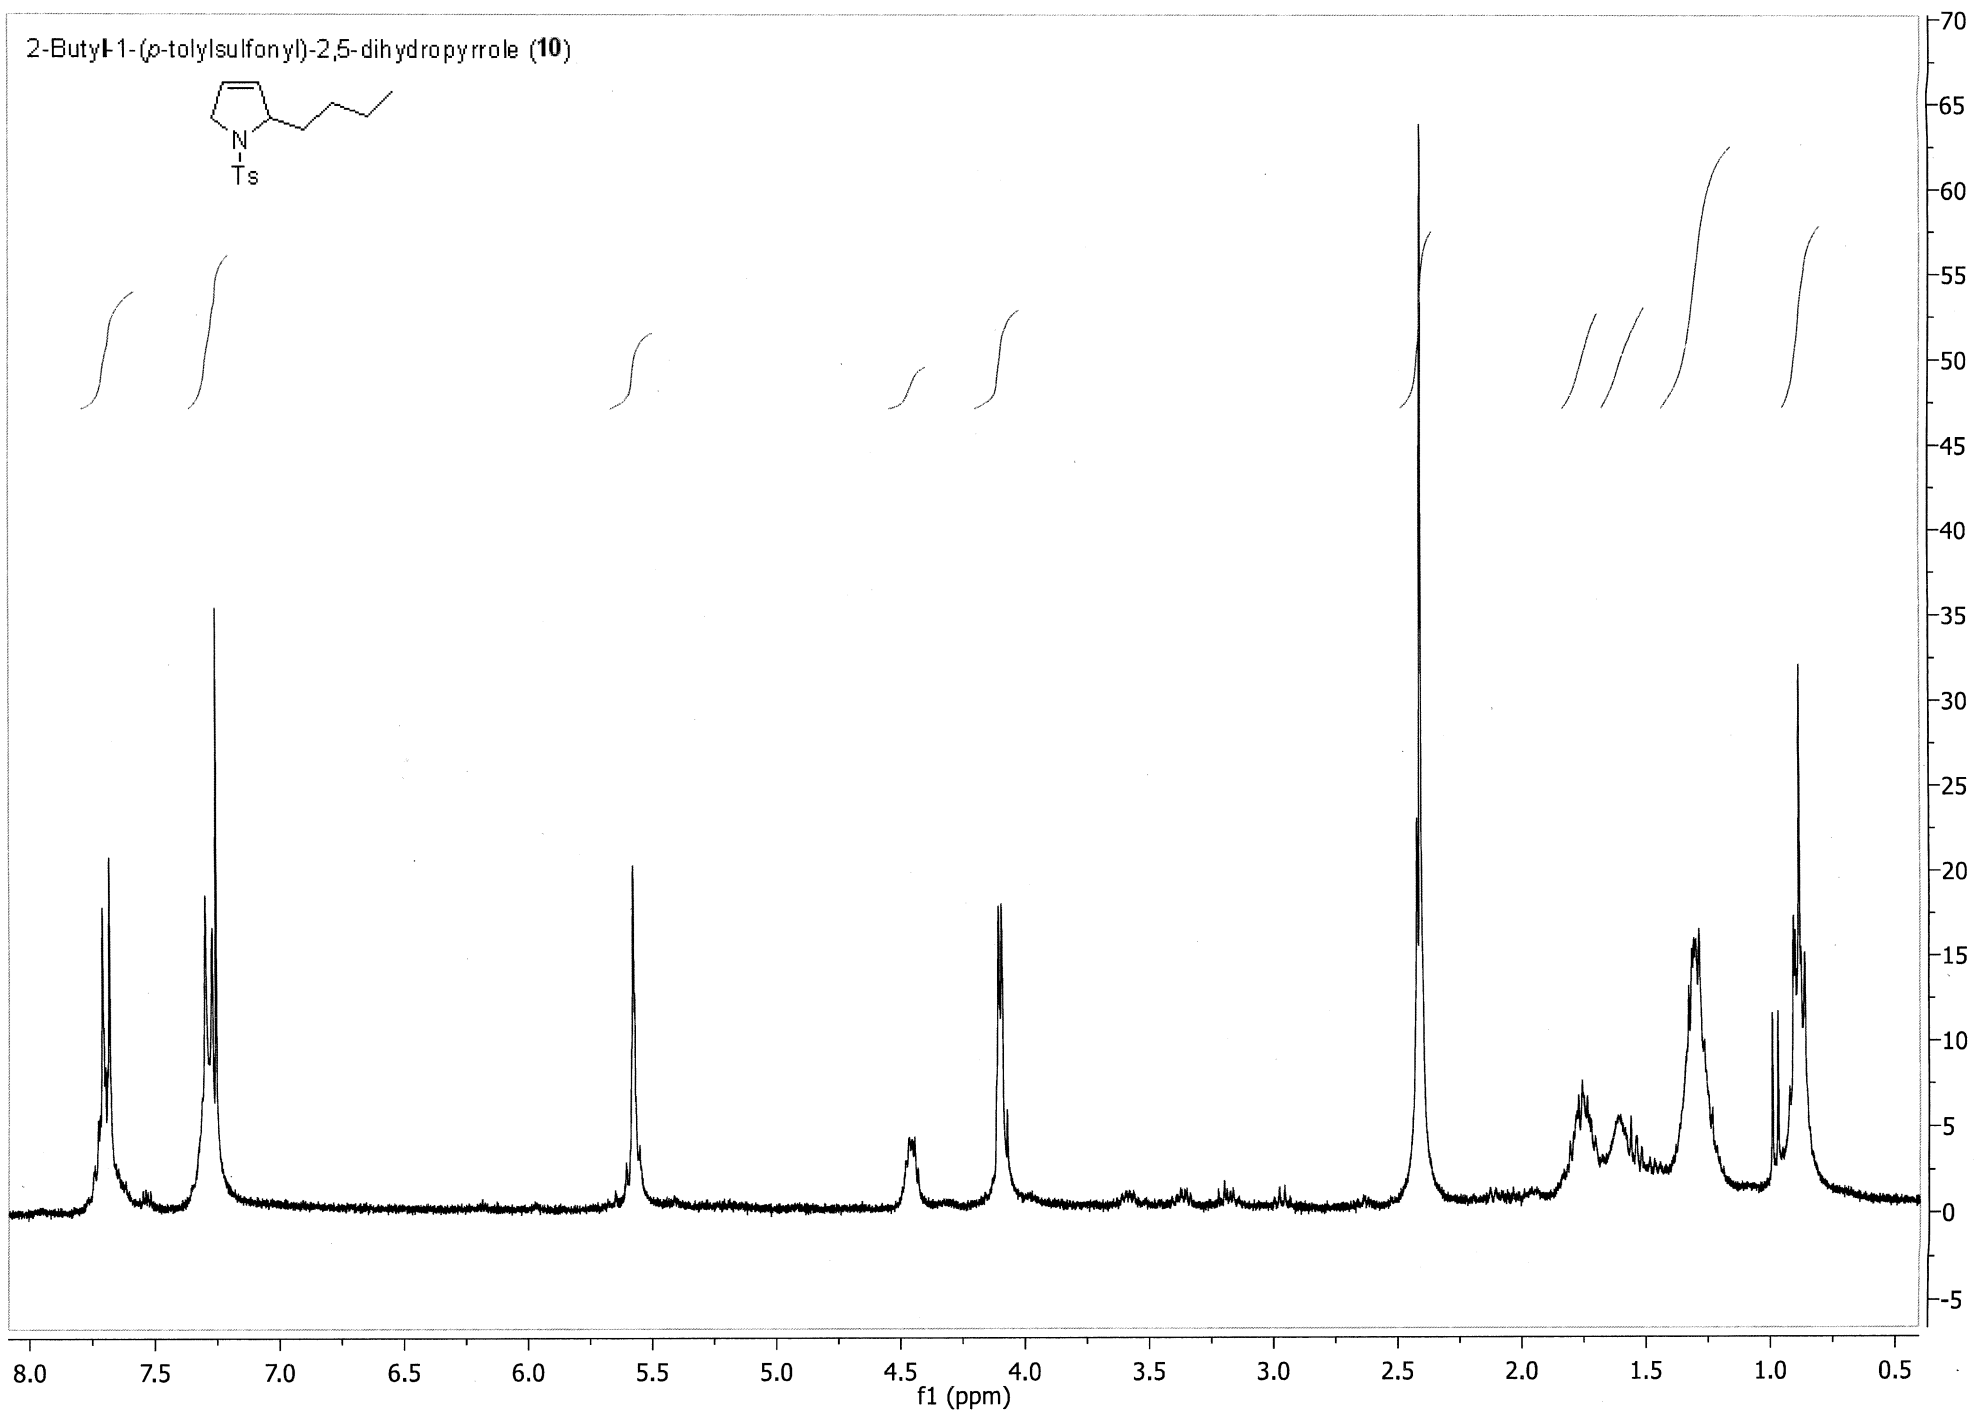

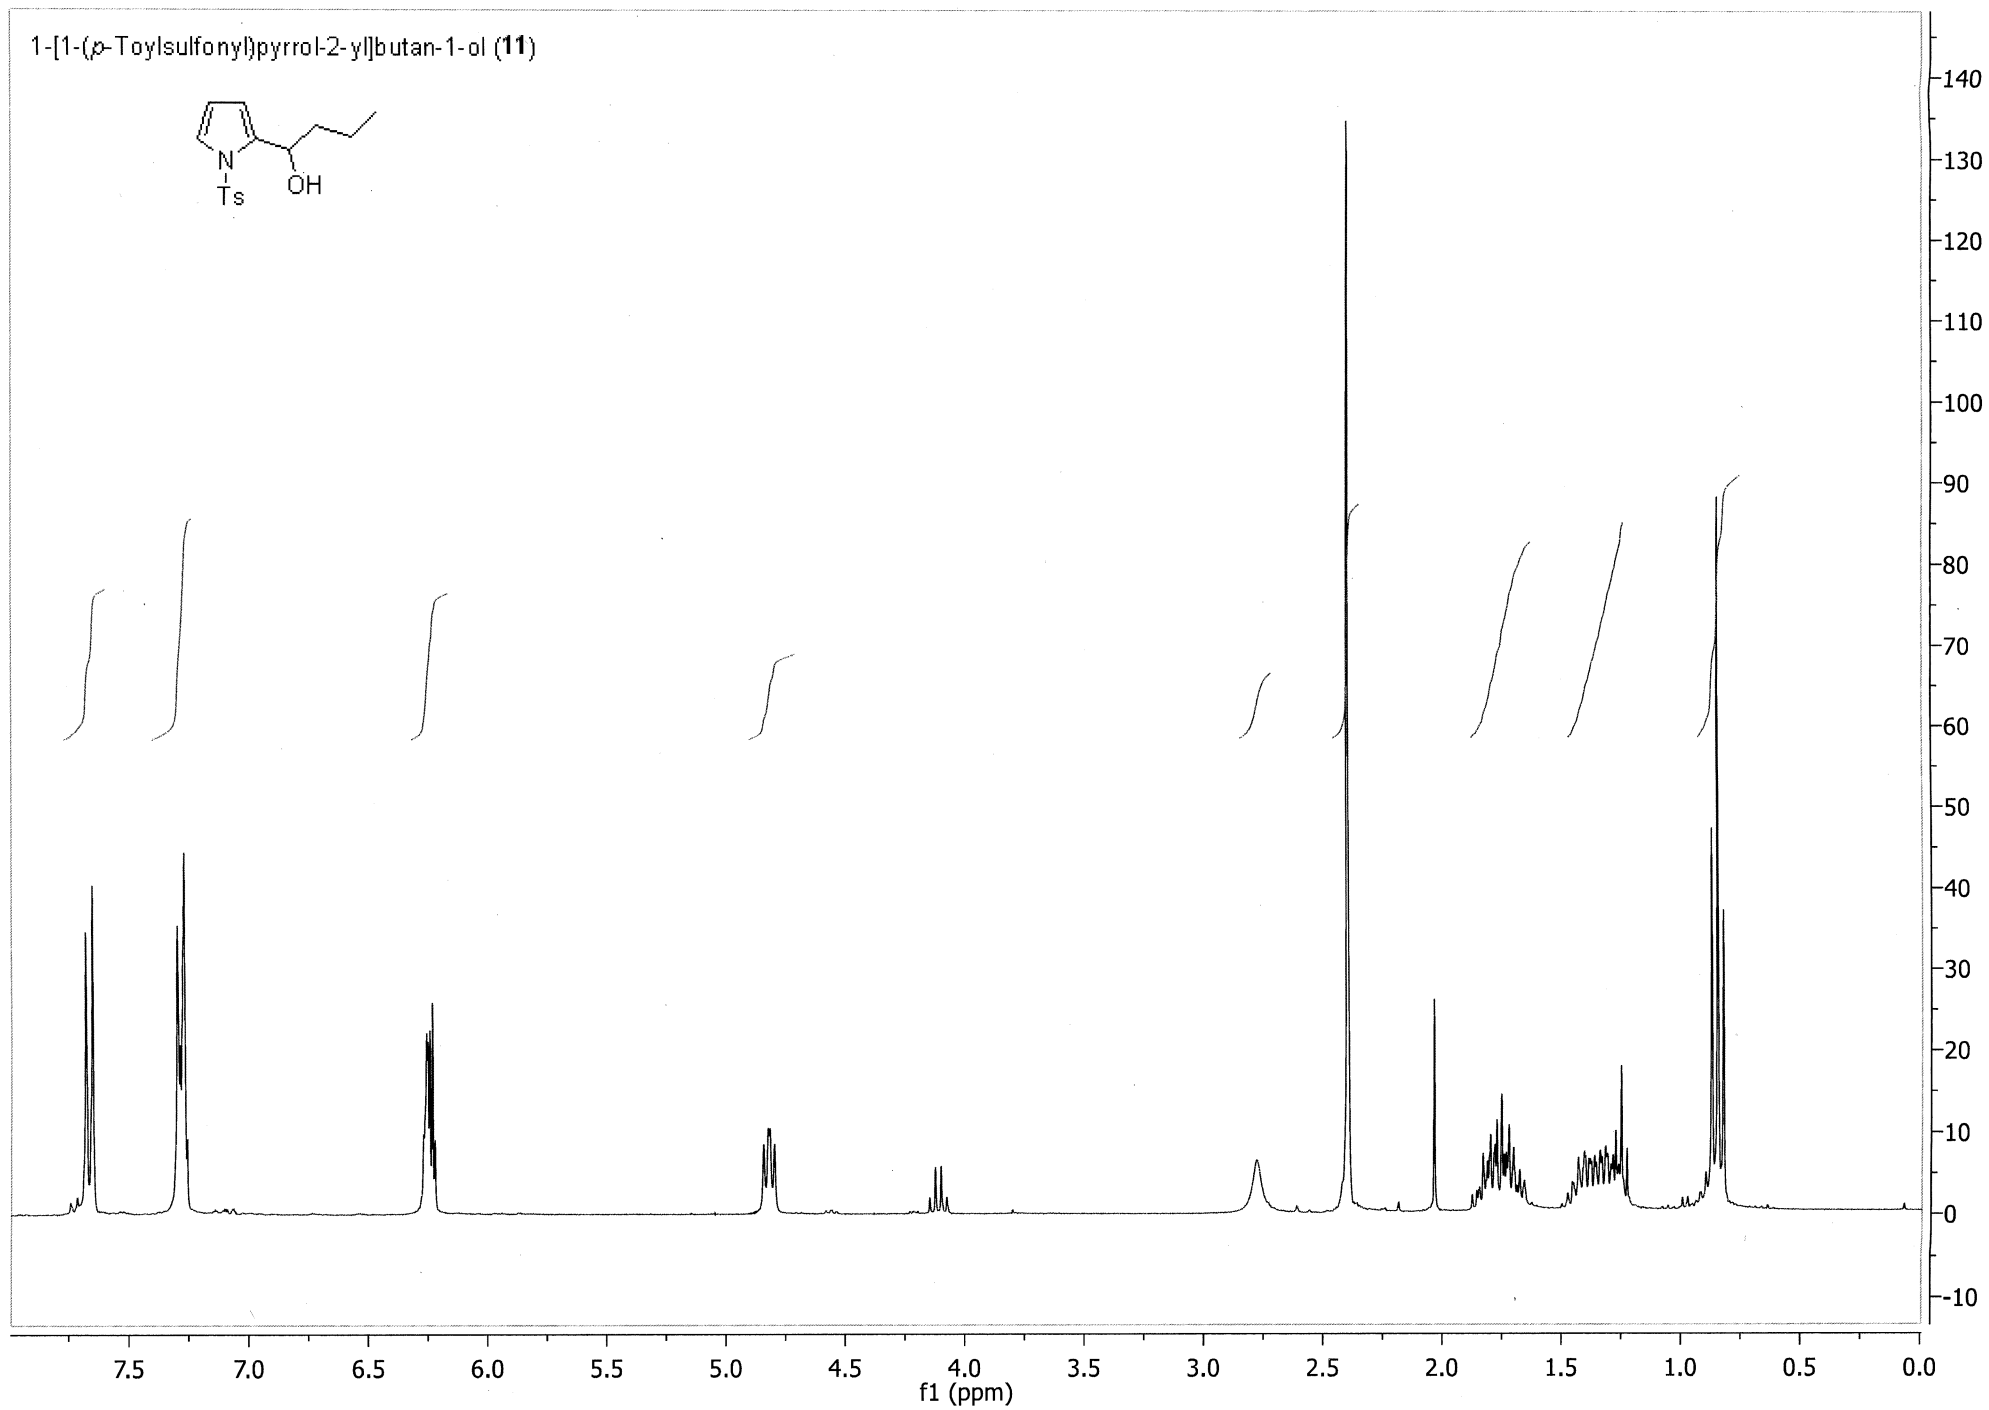

2-Butyl-1-(*p*-tolylsulfonyl)pyrrole (**12**)

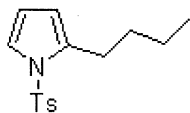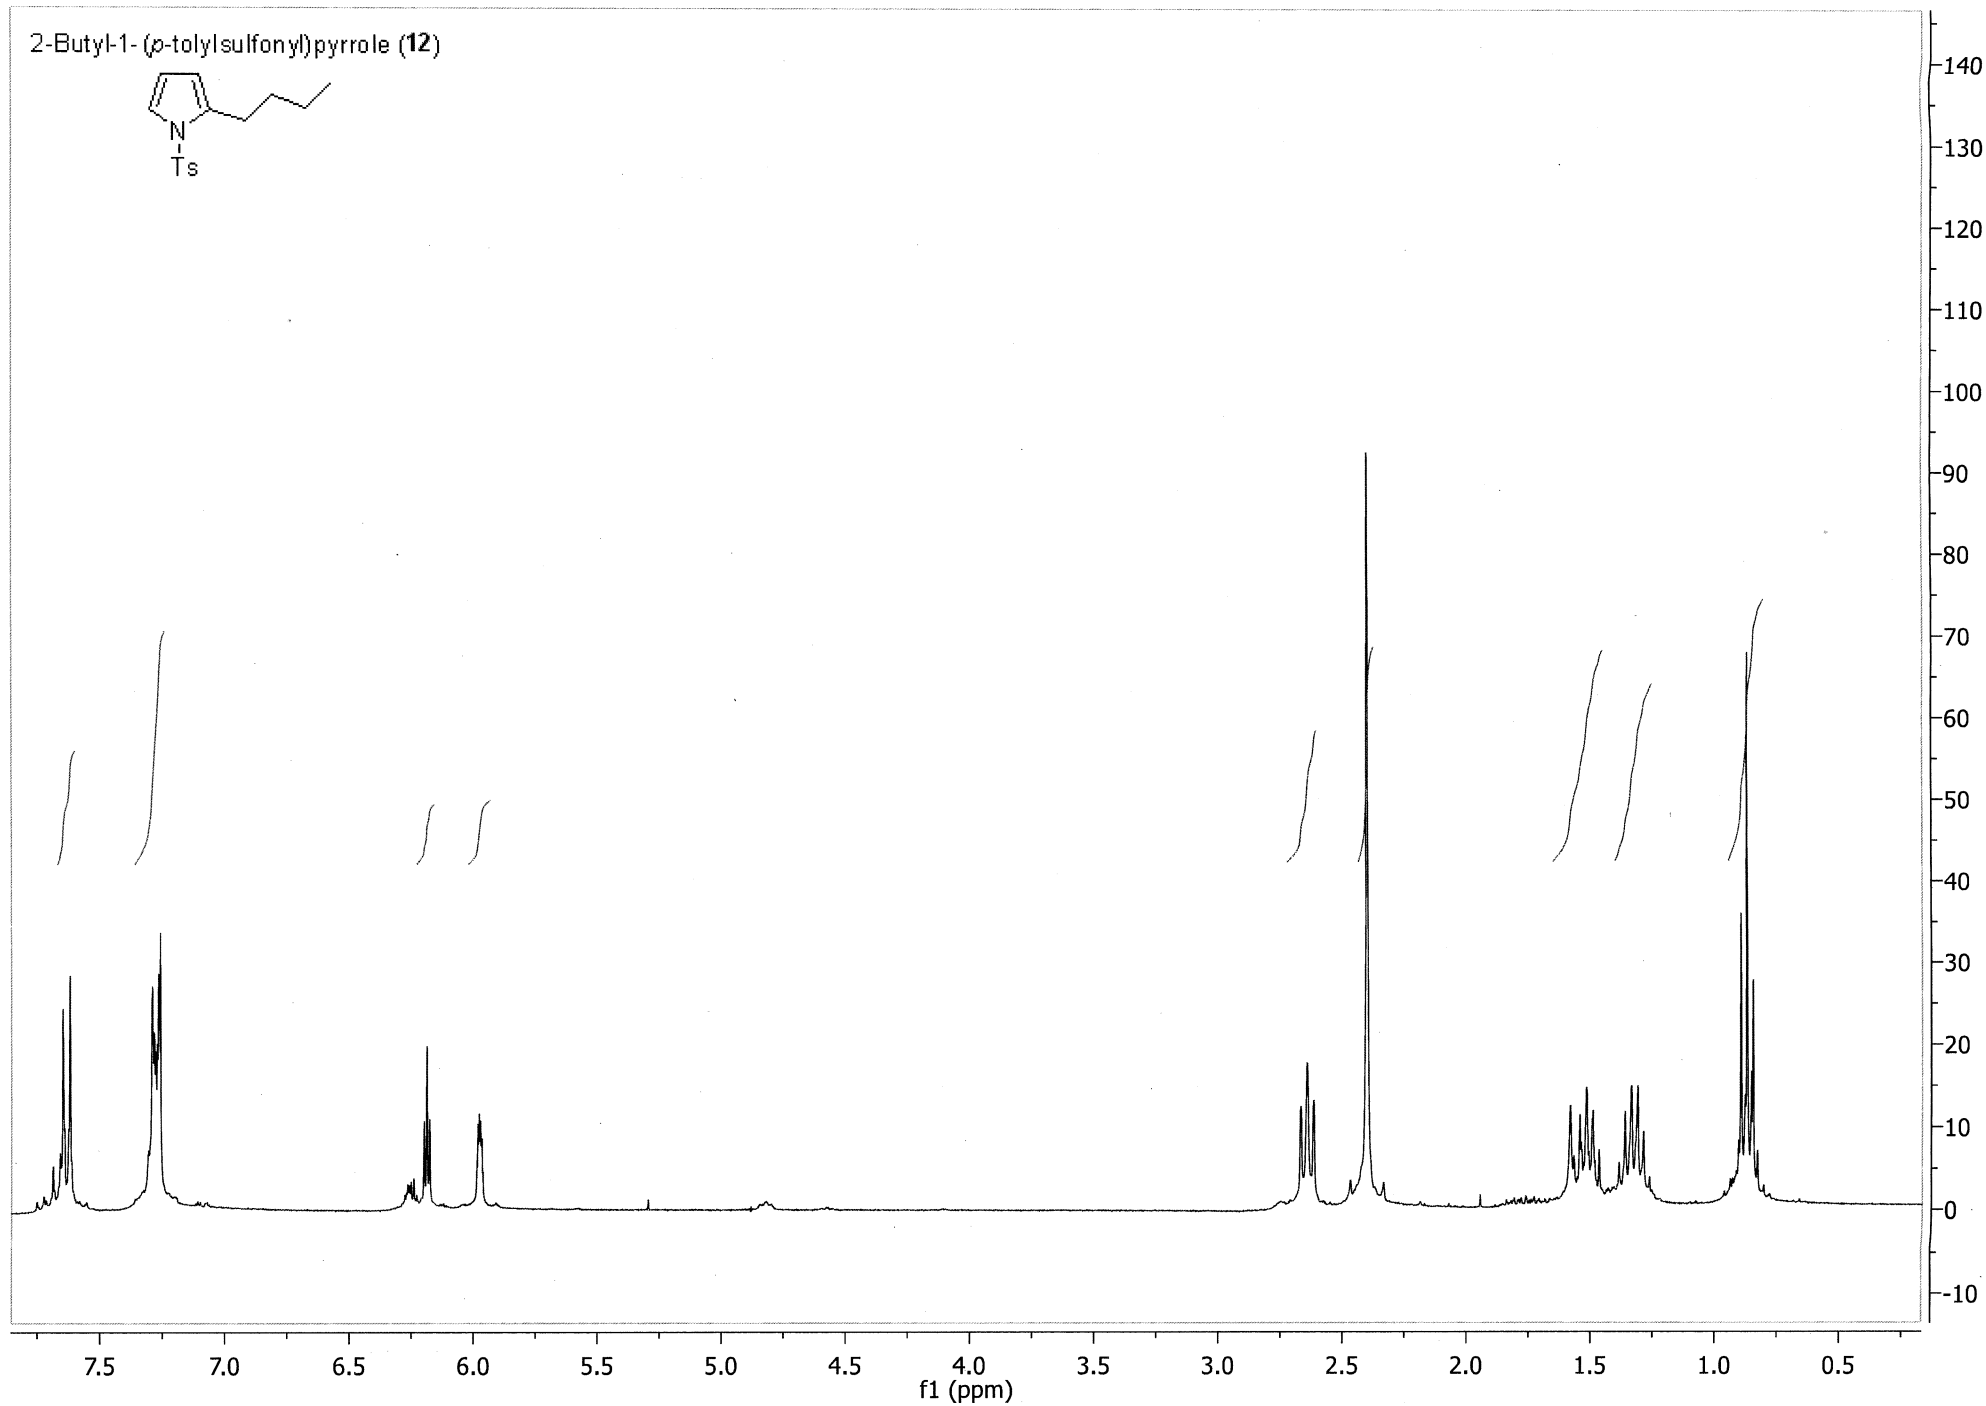

(4-Methoxyphenyl)-[1-(*p*-tolylsulfonyl)pyrrole-2-yl]methanol (**16**)

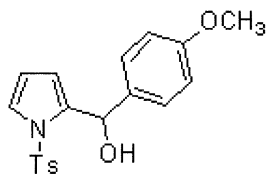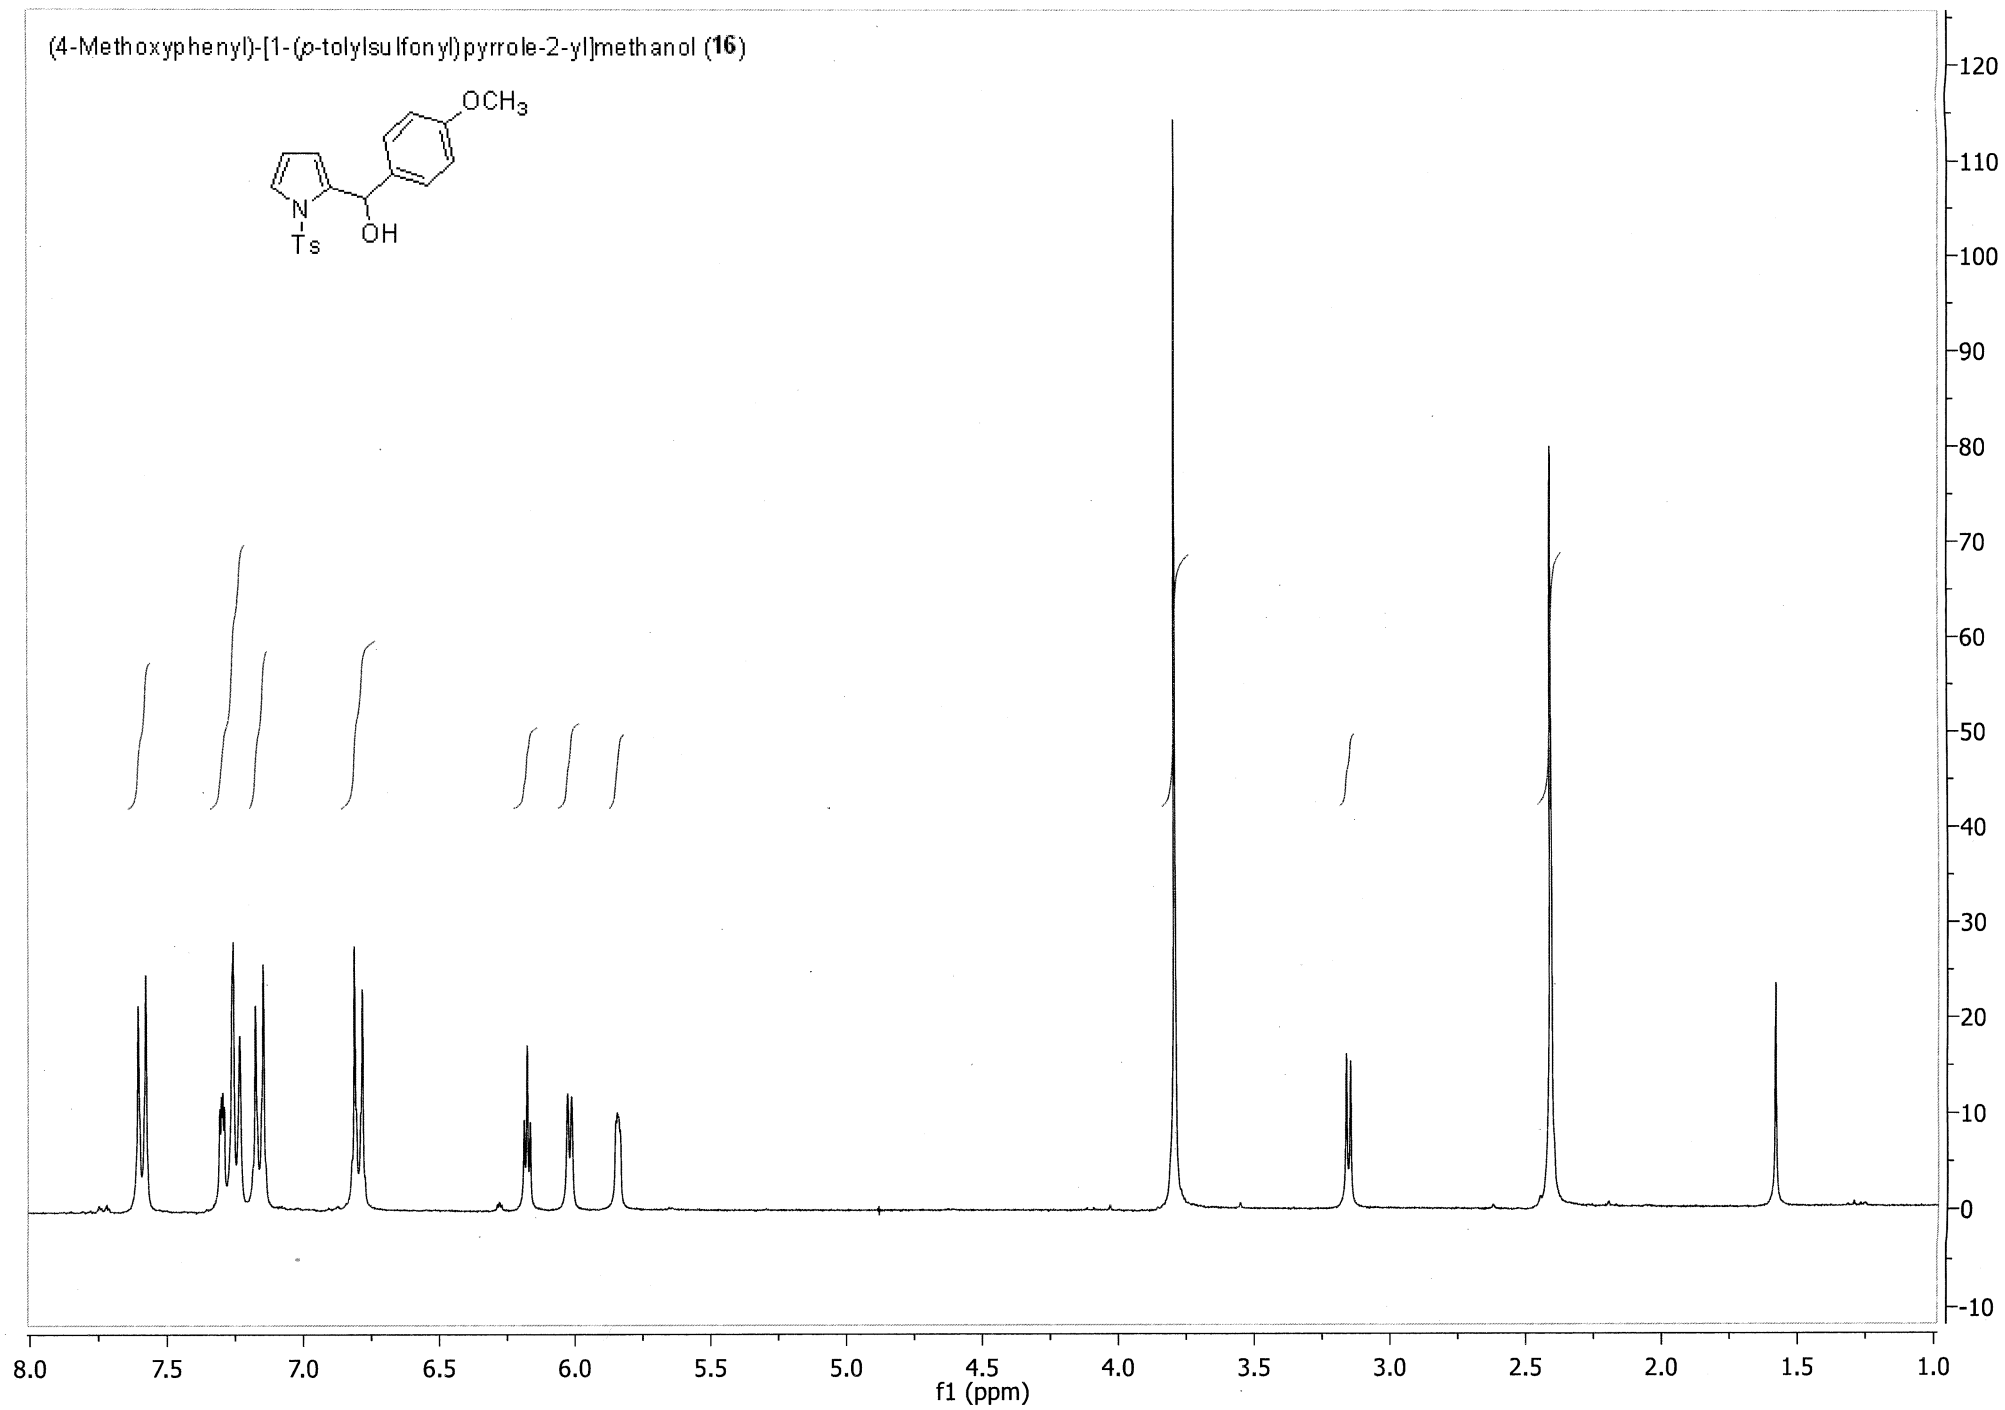

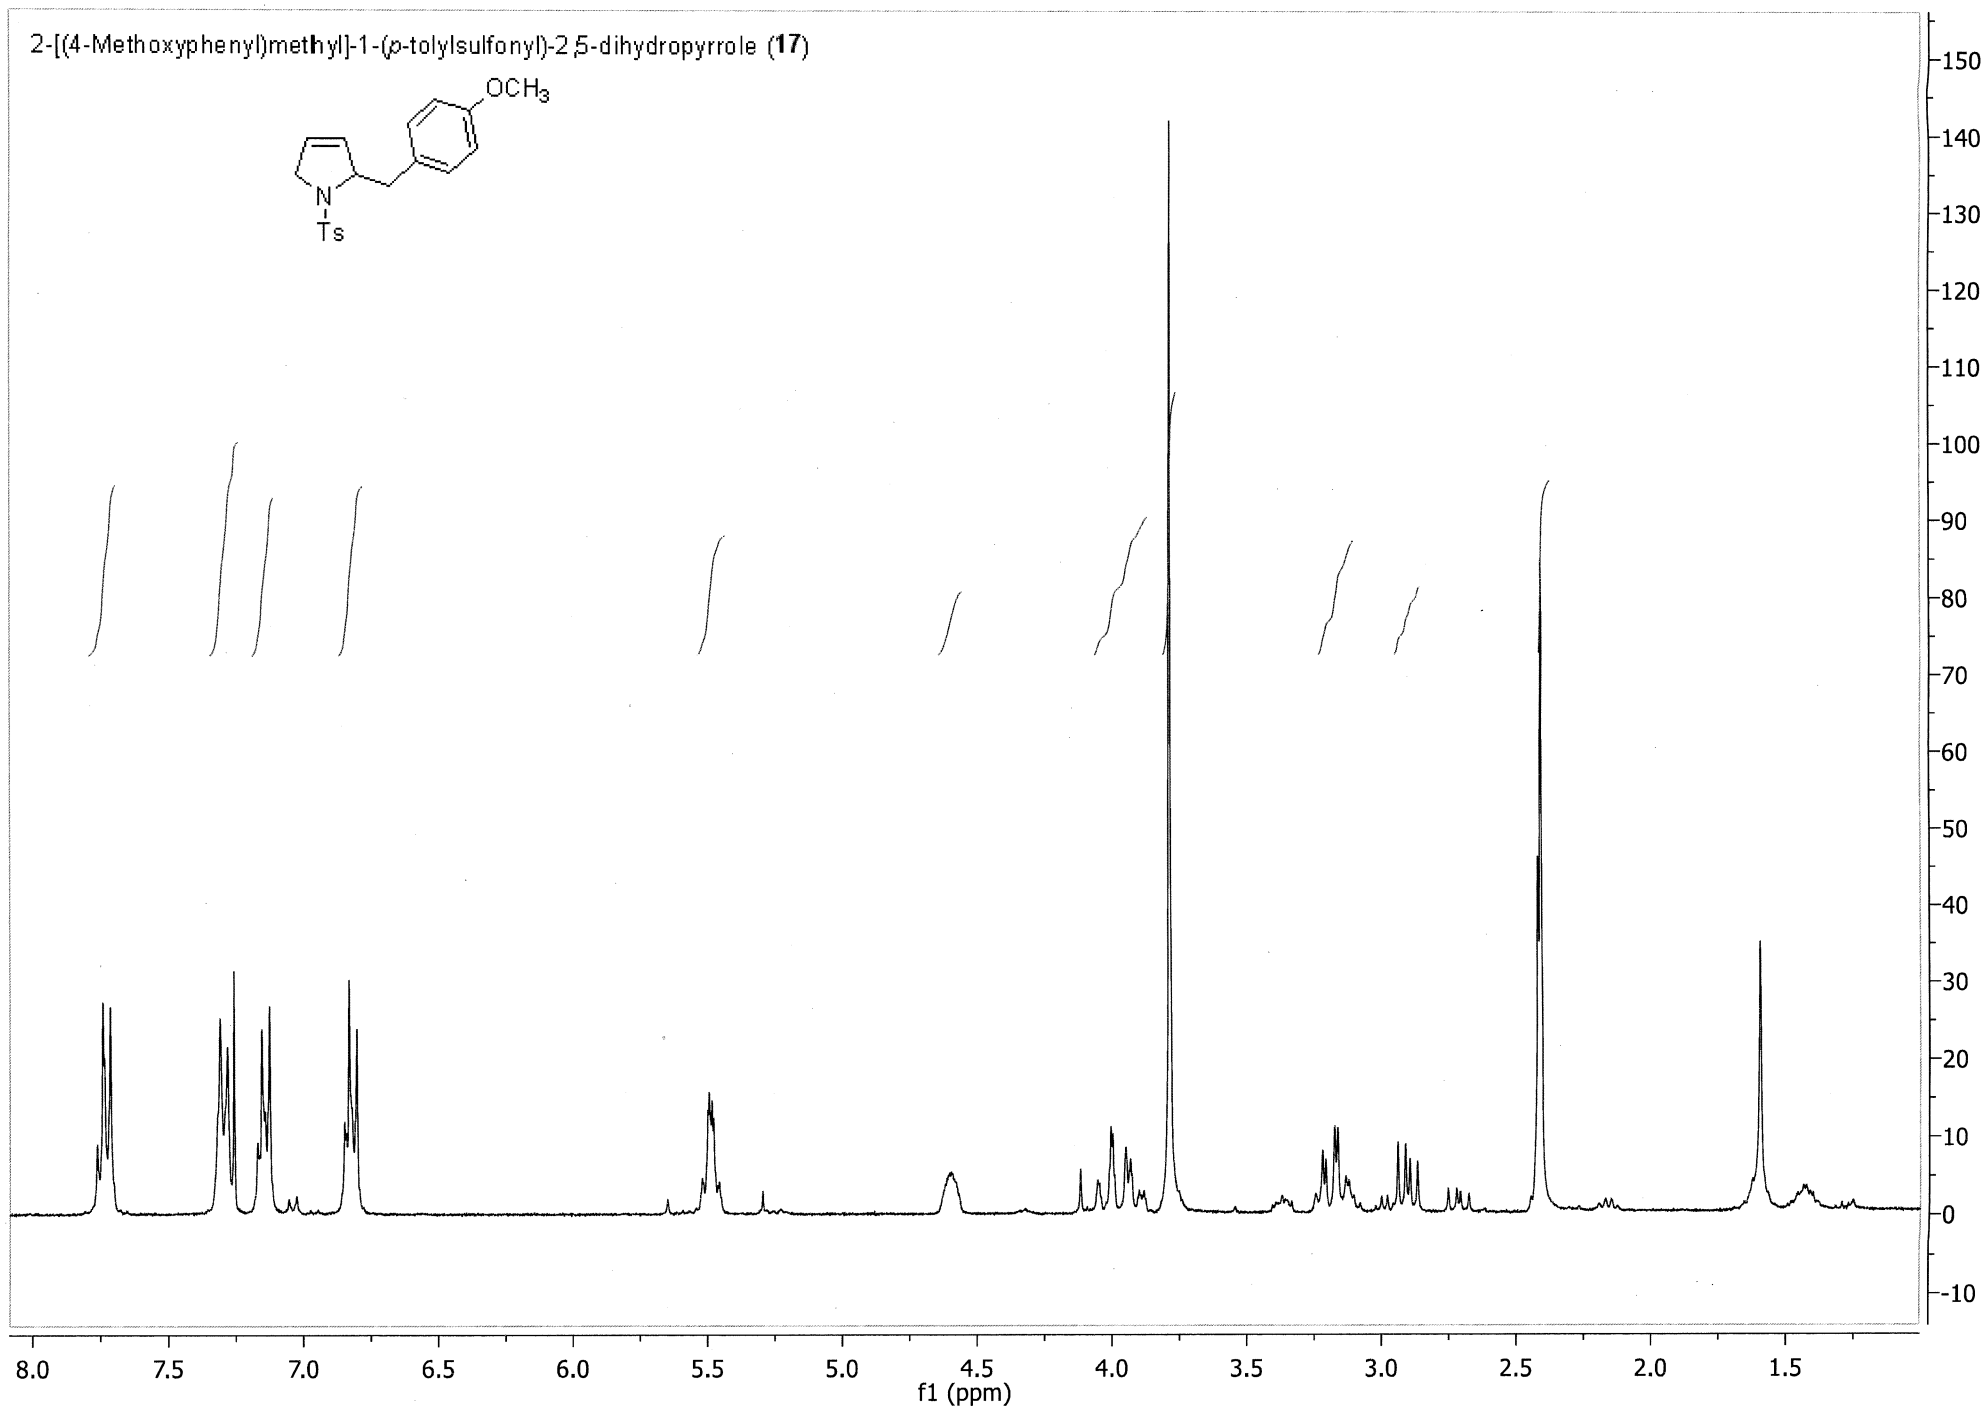

1-[5-Butyl-1-(*p*-tolylsulfonyl)pyrrol-2-yl]heptan-1-one (**20**)

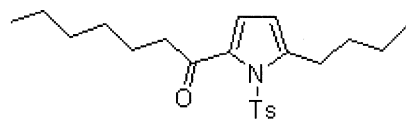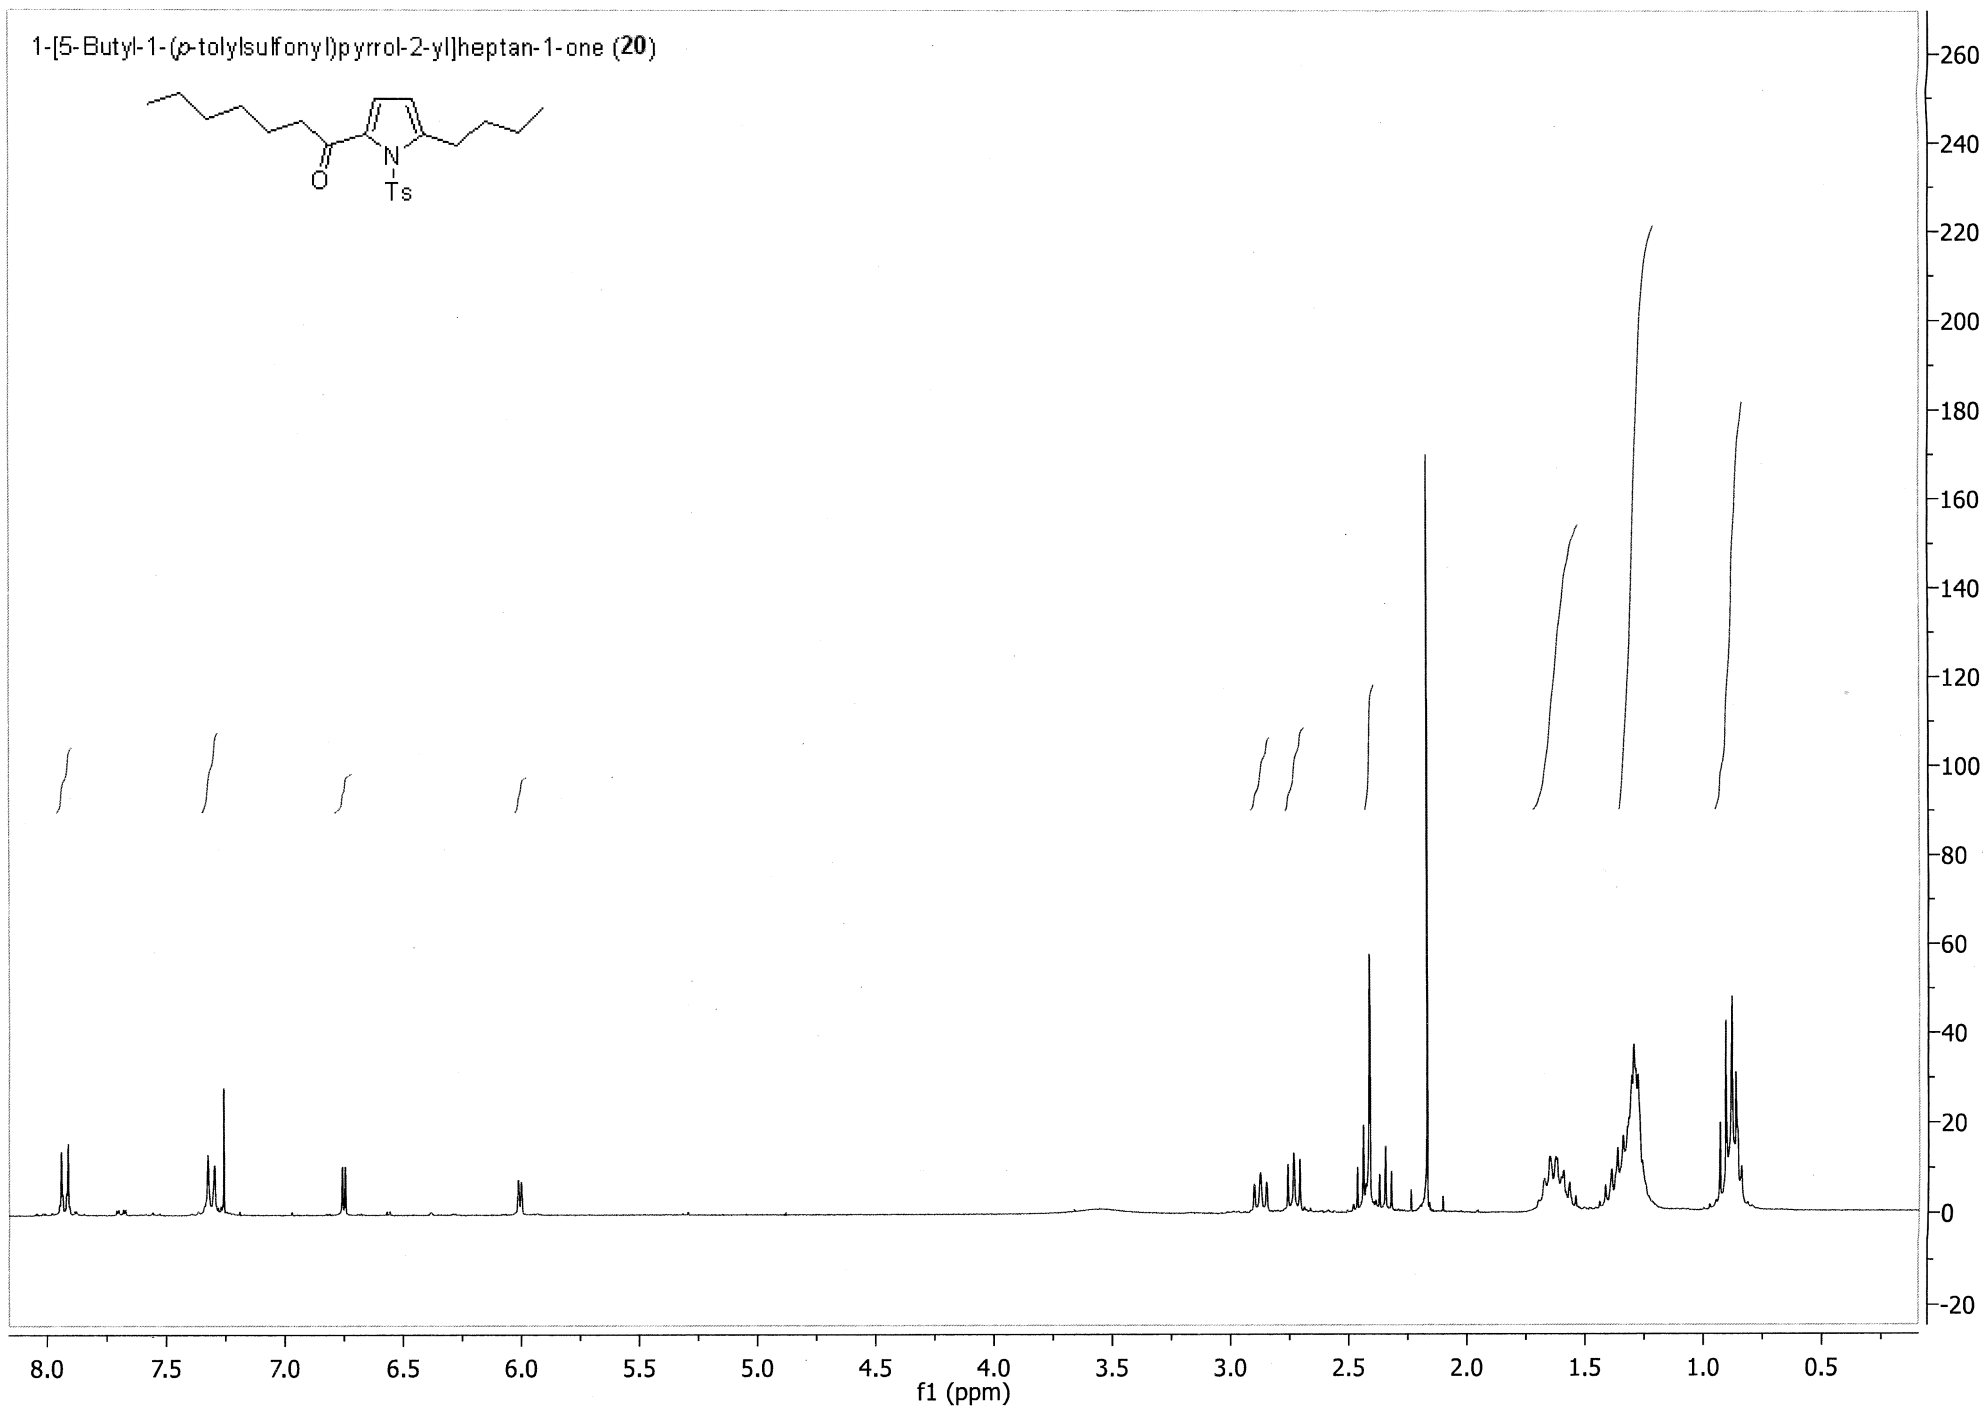

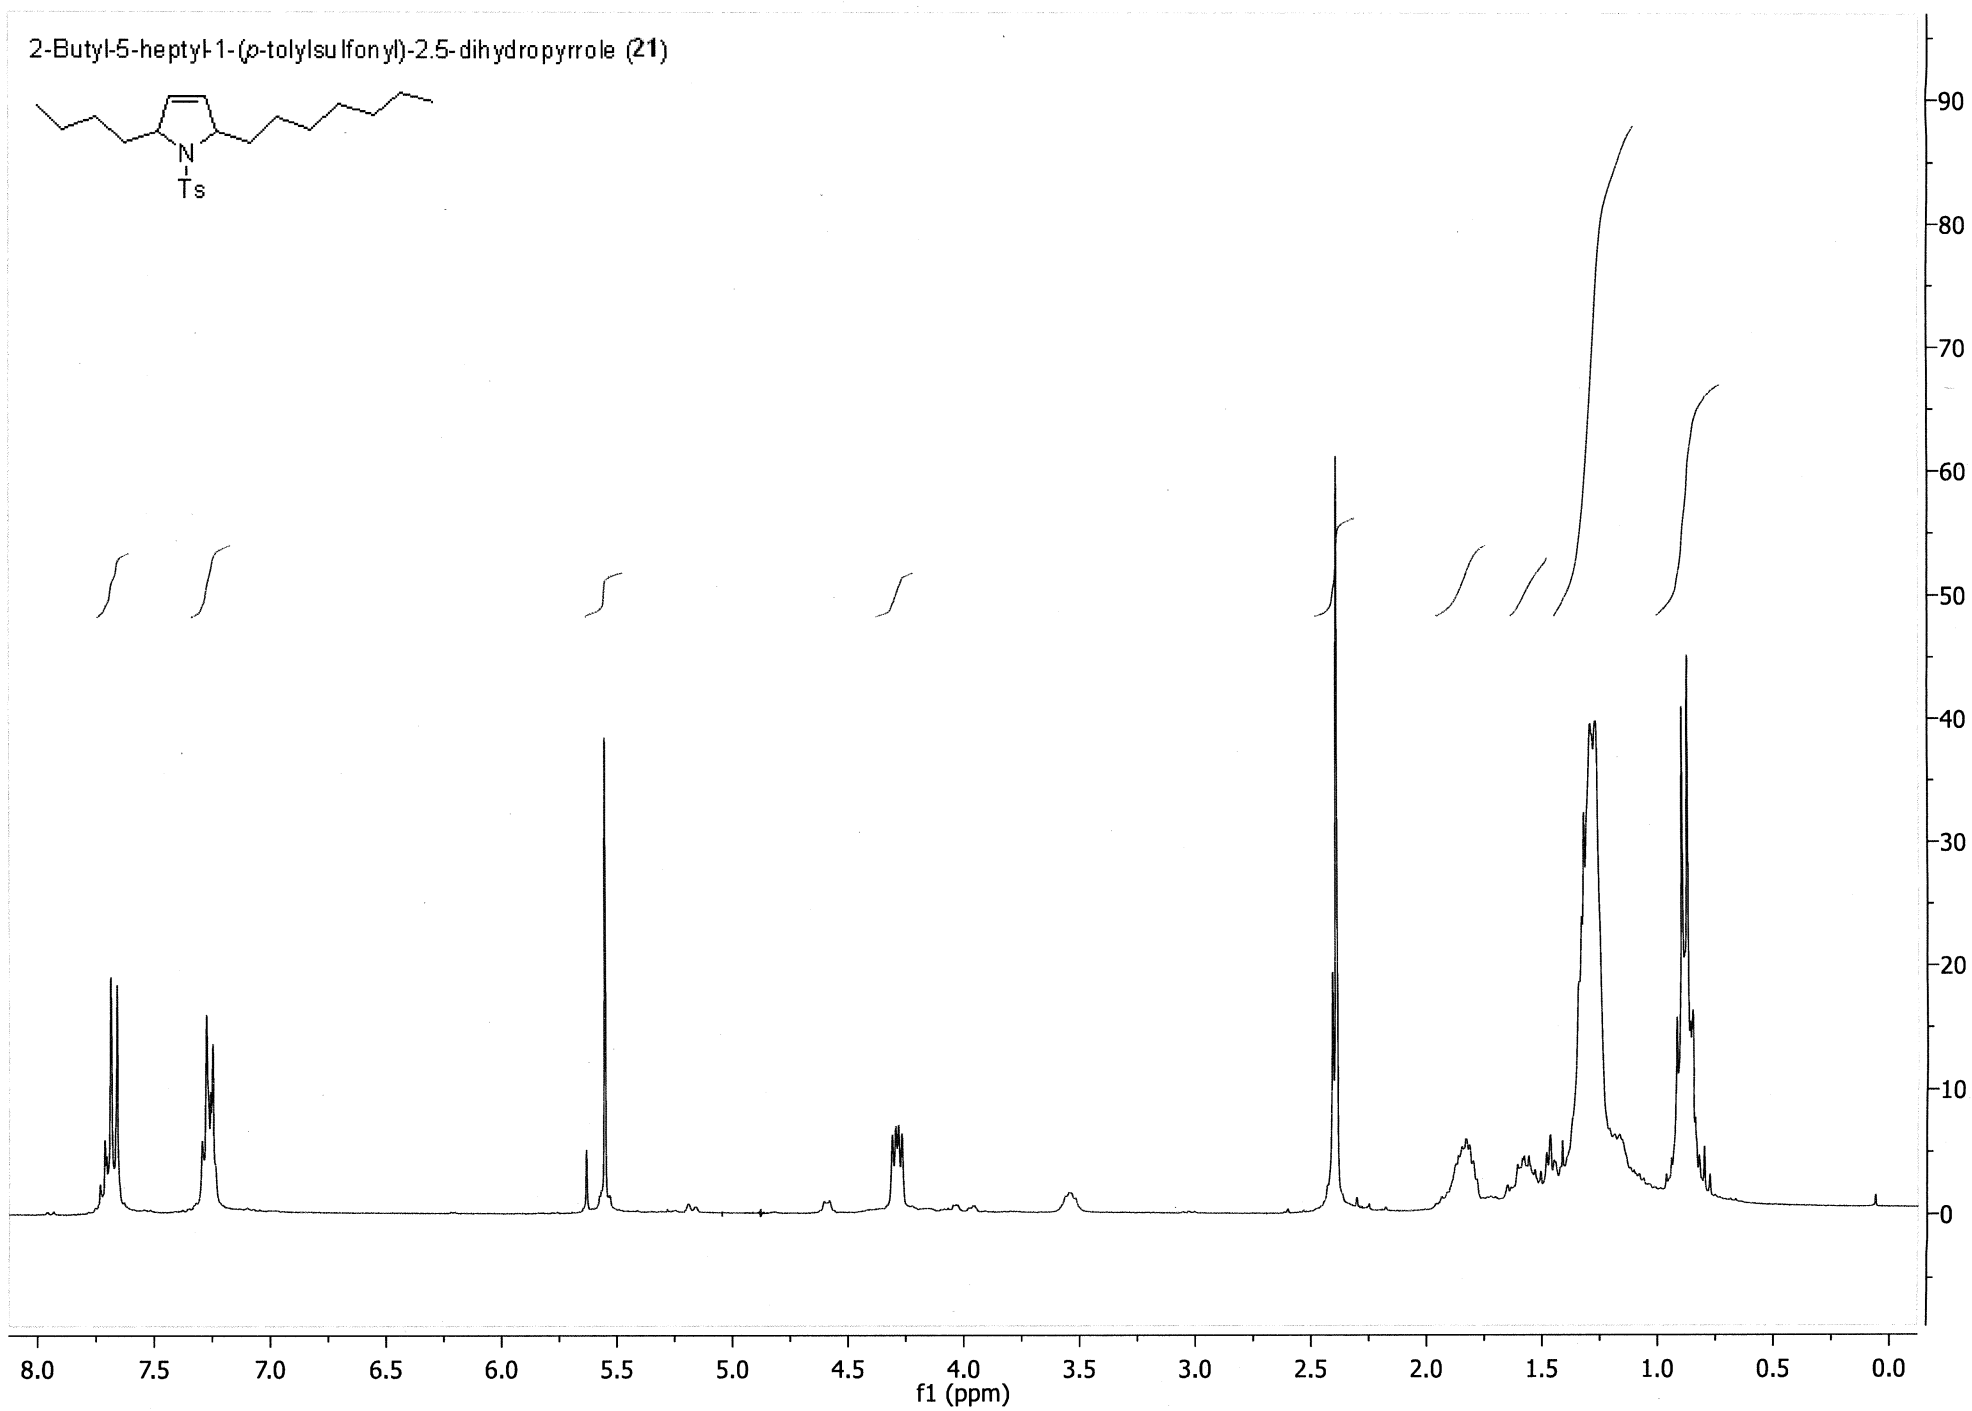

Supplement: c1ob05111c.pdf [file c1ob05111c.pdf]
